# Supplementary material for: Associations of PM2.5 Constituents and Sources with Hospital Admissions: Analysis of Four Counties in Connecticut and Massachusetts (USA) for Persons ≥ 65 Years of Age
Source: PubMed Central journal article supplement (PMC3915260; doi:10.1289/ehp.1306656), 2013-11-08

**Supplemental Material**

**Associations of PM<sub>2.5</sub> Constituents and Sources with Hospital Admissions:  
Analysis of Four Counties in Connecticut and Massachusetts (USA) for  
Persons ≥ 65 Years of Age**

Michelle L. Bell, Keita Ebisu, Brian P. Leaderer, Janneane F. Gent, Hyung Joo Lee, Petros Koutrakis, Yun Wang, Francesca Dominici, and Roger D. Peng

**Table of contents**

|                                                                                                                                                                                                                             |   |
|-----------------------------------------------------------------------------------------------------------------------------------------------------------------------------------------------------------------------------|---|
| <b>Supplemental Material, Table S1.</b> Summary statistics of data stratified by county.....                                                                                                                                | 2 |
| <b>Supplemental Material, Table S2.</b> Correlation of PM <sub>2.5</sub> sources and PM <sub>2.5</sub> chemical components.....                                                                                             | 3 |
| <b>Supplemental Material, Figure S1.</b> Location of monitors and county in Connecticut.....                                                                                                                                | 4 |
| <b>Supplemental Material, Figure S2.</b> Percent increase in risk of respiratory hospital admissions per IQR increase in exposure to PM <sub>2.5</sub> chlorine, with adjustment by other PM <sub>2.5</sub> components..... | 5 |

**Supplemental Material, Table S1.** Summary statistics of data stratified by county.

| <b>County</b> | <b>Cause of Hospital Admissions</b> | <b>Mean <math>\pm</math> SD (admissions /day)</b> | <b>Median (admissions/day)</b> | <b>IQR (admissions /day)</b> | <b>Total admissions across study period</b> | <b>Population at risk/day</b> |
|---------------|-------------------------------------|---------------------------------------------------|--------------------------------|------------------------------|---------------------------------------------|-------------------------------|
| Fairfield     | CVD                                 | 18.8 $\pm$ 5.7                                    | 18                             | 8                            | 24,672                                      | 89,290                        |
|               | Respiratory                         | 5.6 $\pm$ 2.9                                     | 5                              | 3                            | 7,324                                       |                               |
| Hartford      | CVD                                 | 21.3 $\pm$ 5.9                                    | 21                             | 8                            | 27,846                                      | 104,558                       |
|               | Respiratory                         | 8.0 $\pm$ 3.7                                     | 7                              | 5                            | 10,512                                      |                               |
| New Haven     | CVD                                 | 21.6 $\pm$ 6.0                                    | 21                             | 9                            | 28,258                                      | 93,683                        |
|               | Respiratory                         | 8.8 $\pm$ 4.0                                     | 8                              | 5                            | 11,565                                      |                               |
| Hampden       | CVD                                 | 11.5 $\pm$ 4.2                                    | 11                             | 5                            | 15,055                                      | 46,368                        |
|               | Respiratory                         | 3.6 $\pm$ 2.2                                     | 3                              | 3                            | 4,768                                       |                               |

**Supplemental Material, Table S2.** Correlation of PM<sub>2.5</sub> sources and PM<sub>2.5</sub> chemical components.

|                  | PM <sub>2.5</sub> Sources |      |           |          |                 | PM <sub>2.5</sub> Elements |      |      |      |       |      |      |      |      |      |      |
|------------------|---------------------------|------|-----------|----------|-----------------|----------------------------|------|------|------|-------|------|------|------|------|------|------|
|                  | Motor vehicles            | Oil  | Road dust | Sea salt | Regional source | Al                         | BC   | Br   | Ca   | Cl    | Ni   | K    | S    | Si   | Ti   | V    |
| <b>Zn</b>        | 0.93                      | 0.40 | 0.18      | 0.16     | 0.02            | 0.19                       | 0.60 | 0.49 | 0.46 | 0.13  | 0.54 | 0.60 | 0.25 | 0.20 | 0.24 | 0.38 |
| <b>V</b>         | 0.29                      | 0.60 | 0.28      | 0.22     | 0.08            | 0.25                       | 0.50 | 0.24 | 0.39 | 0.20  | 0.85 | 0.28 | 0.23 | 0.25 | 0.21 |      |
| <b>Ti</b>        | 0.20                      | 0.04 | 0.63      | 0.09     | 0.19            | 0.65                       | 0.37 | 0.16 | 0.63 | 0.08  | 0.22 | 0.36 | 0.30 | 0.65 |      |      |
| <b>Si</b>        | 0.12                      | 0.07 | 0.89      | 0.07     | 0.16            | 0.96                       | 0.43 | 0.14 | 0.81 | 0.07  | 0.23 | 0.44 | 0.27 |      |      |      |
| <b>S</b>         | 0.17                      | 0.24 | 0.16      | -0.02    | 0.95            | 0.34                       | 0.34 | 0.38 | 0.33 | -0.02 | 0.26 | 0.38 |      |      |      |      |
| <b>K</b>         | 0.56                      | 0.39 | 0.36      | 0.14     | 0.20            | 0.44                       | 0.47 | 0.52 | 0.52 | 0.11  | 0.39 |      |      |      |      |      |
| <b>Ni</b>        | 0.49                      | 0.67 | 0.25      | 0.26     | 0.06            | 0.22                       | 0.55 | 0.37 | 0.43 | 0.24  |      |      |      |      |      |      |
| <b>Cl</b>        | 0.10                      | 0.09 | 0.03      | 0.94     | -0.07           | 0.09                       | 0.12 | 0.14 | 0.20 |       |      |      |      |      |      |      |
| <b>Ca</b>        | 0.42                      | 0.13 | 0.87      | 0.20     | 0.17            | 0.78                       | 0.66 | 0.28 |      |       |      |      |      |      |      |      |
| <b>Br</b>        | 0.48                      | 0.38 | 0.09      | 0.17     | 0.25            | 0.15                       | 0.36 |      |      |       |      |      |      |      |      |      |
| <b>BC</b>        | 0.61                      | 0.22 | 0.53      | 0.12     | 0.20            | 0.44                       |      |      |      |       |      |      |      |      |      |      |
| <b>Al</b>        | 0.11                      | 0.05 | 0.86      | 0.08     | 0.24            |                            |      |      |      |       |      |      |      |      |      |      |
| <b>Regional</b>  | -0.04                     | 0.02 | 0.06      | -0.08    |                 |                            |      |      |      |       |      |      |      |      |      |      |
| <b>Sea salt</b>  | 0.13                      | 0.13 | 0.01      |          |                 |                            |      |      |      |       |      |      |      |      |      |      |
| <b>Road dust</b> | 0.12                      | 0.00 |           |          |                 |                            |      |      |      |       |      |      |      |      |      |      |
| <b>Oil</b>       | 0.24                      |      |           |          |                 |                            |      |      |      |       |      |      |      |      |      |      |

**Supplemental Material, Figure S1.** Location of monitors and counties in Connecticut and Massachusetts.

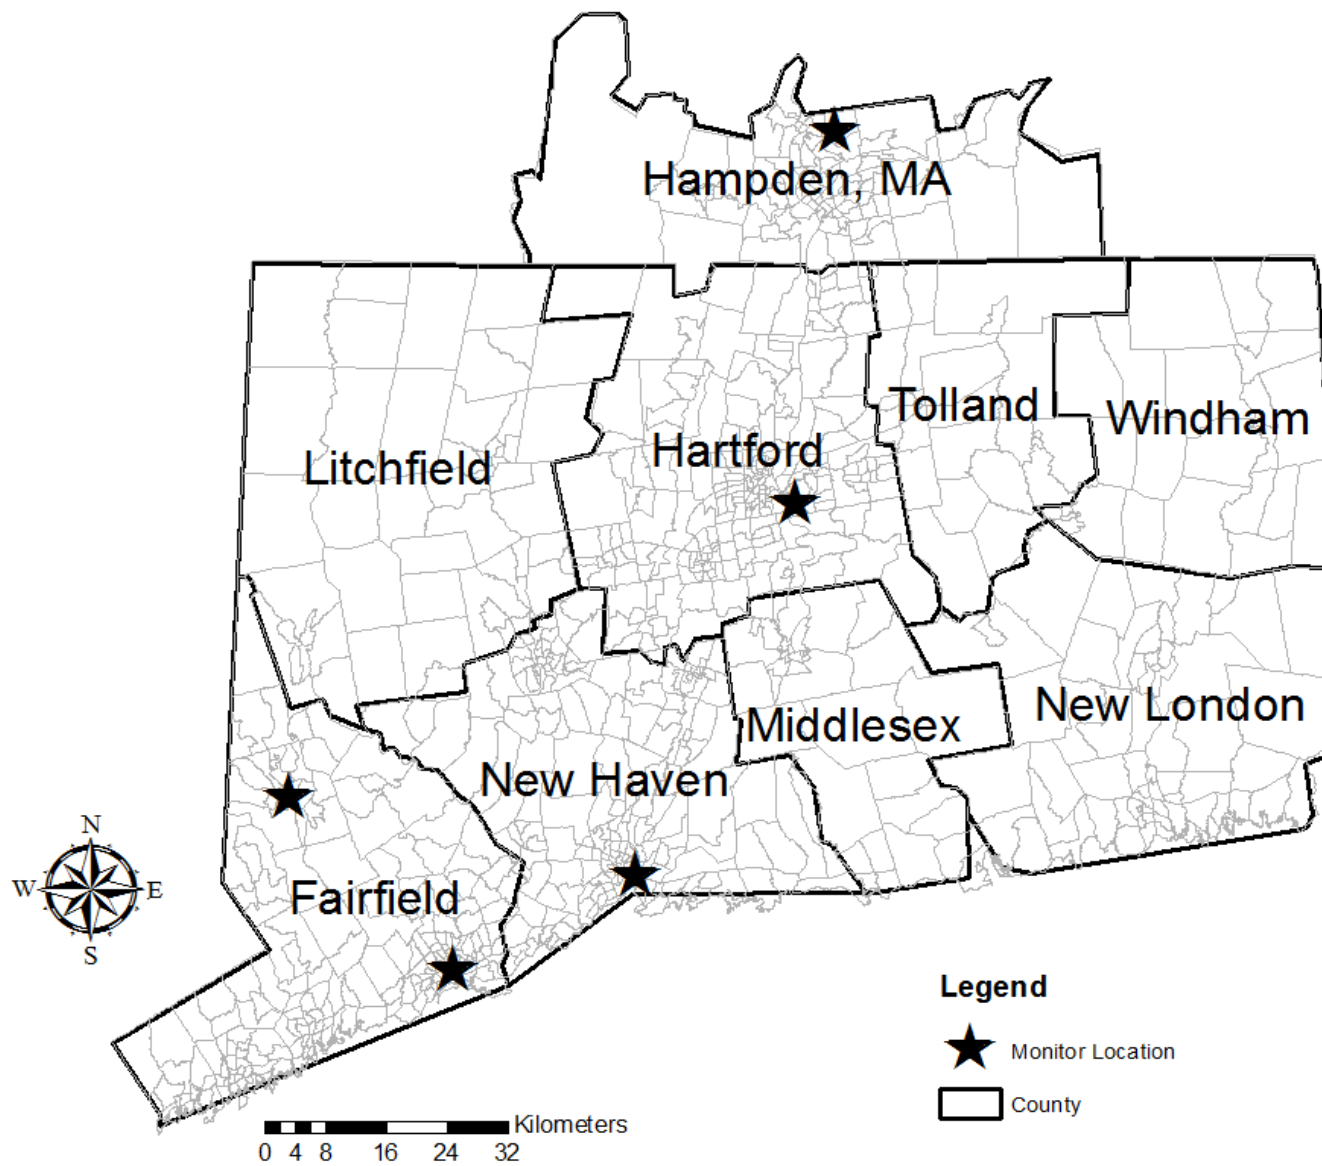

**Supplemental Material, Figure S2.** Percent change in risk of respiratory hospital admissions per IQR increase in exposure to PM<sub>2.5</sub> chlorine, with adjustment by other PM<sub>2.5</sub> components. Note: The point represents the central estimate; the horizontal line represents the 95% confidence interval.

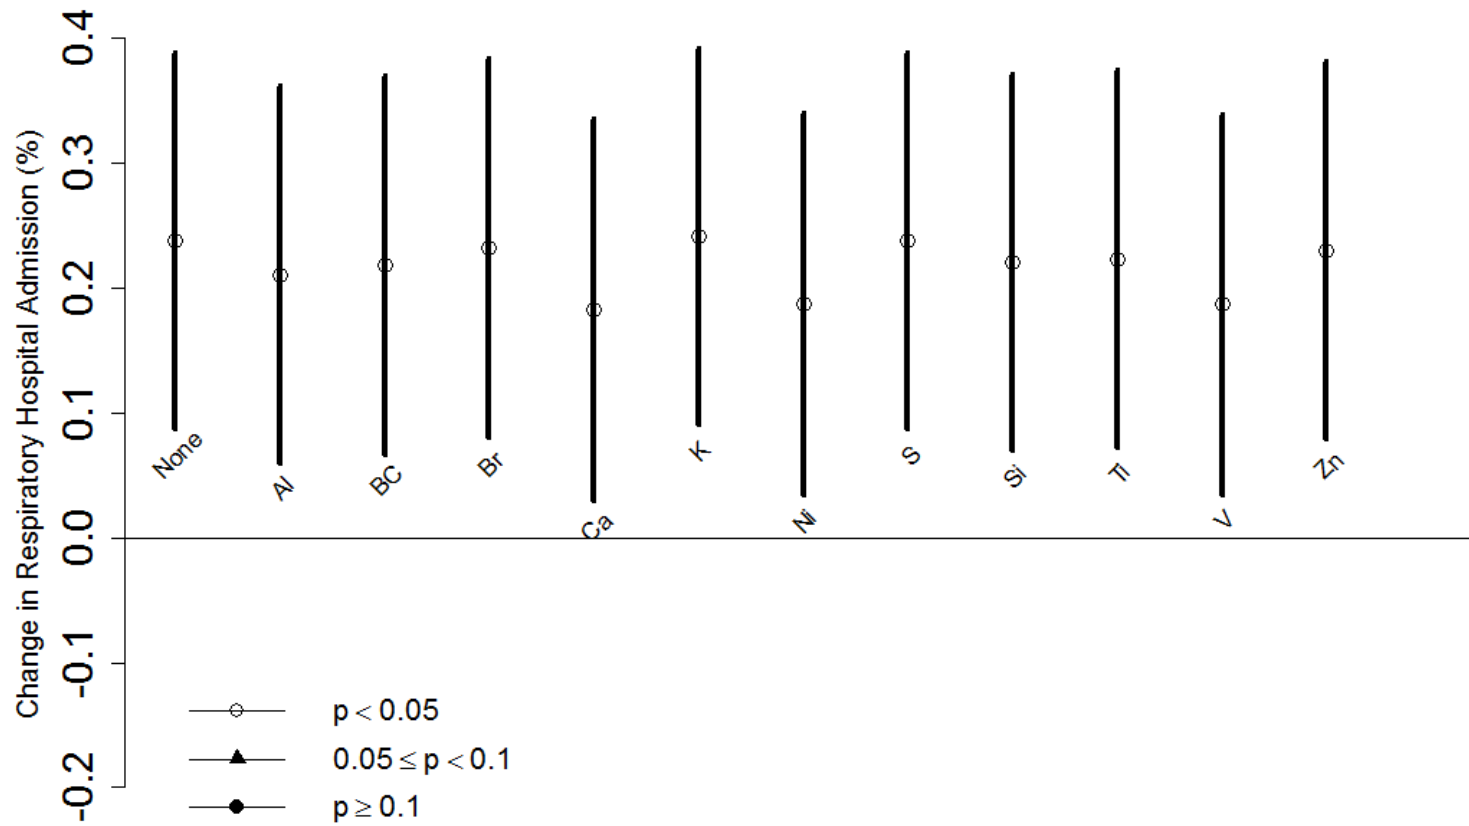

Supplement: ehp.1306656.s001.508.pdf [file ehp.1306656.s001.508.pdf]
